# Supplementary material for: Gut microbiome structure in asylum seekers newly arrived in Italy from Africa
Source: Research Square preprint supplement (doi:10.21203/rs.3.rs-5929447/v1), 2025-04-30
Supplement: Supplementary file 1 [file db63a6073ad24be8e7299a33.pdf]

# Assessing the impact of migration-related stressors on refugees' gut microbiome

Giorgia Palladino<sup>1,2</sup>, Marianna Marangi<sup>3</sup>, Daniel Scicchitano<sup>1,2</sup>, Silvia Turrone<sup>1,4</sup>, Simone Rampelli<sup>1,2</sup>, Marco Candela<sup>1,2\*</sup>

<sup>1</sup>Unit of Microbiome Science and Biotechnology, Department of Pharmacy and Biotechnology, Alma Mater Studiorum - University of Bologna, Via Belmeloro 6, 40126 Bologna, Italy

<sup>2</sup>Fano Marine Center, The Inter-Institute Center for Research on Marine Biodiversity, Resources and Biotechnologies, Viale Adriatico 1, 61032, Fano, Italy

<sup>3</sup>Department of Clinical and Experimental Medicine, University of Foggia, Foggia, Italy

<sup>4</sup>IRCCS Azienda Ospedaliero-Universitaria di Bologna, 40138 Bologna, Italy

\*corresponding author: marco.candela@unibo.it

*Supplementary information*

**Supplementary Table 1 - Overlapping gut microbiome compositional features between refugees and rural populations.** Refugee gut microbiome genera that were similarly represented in rural populations but significantly decreased in urban populations are shown (Wilcoxon rank-sum test corrected with FDR, p-values  $\leq 0.05$ ).

| Bacterial genera          | P-values          |                   |
|---------------------------|-------------------|-------------------|
|                           | Refugees vs rural | Refugees vs urban |
| Alloprevotella            | > 0.05            | < 0.001           |
| Prevotella                | > 0.05            | < 0.001           |
| Prevotella 7              | > 0.05            | < 0.01            |
| Streptococcus             | > 0.05            | < 0.05            |
| Ruminococcus gnavus group | > 0.05            | < 0.001           |
| Dorea                     | > 0.05            | < 0.001           |
| Lachnoclostridium         | > 0.05            | < 0.001           |
| Tyzzarella                | > 0.05            | < 0.001           |
| Romboutsia                | > 0.05            | < 0.05            |
| Succinivibrio             | > 0.05            | < 0.001           |
| Akkermansia               | > 0.05            | < 0.001           |
